# Supplementary material
Source: PubMed Central journal article supplement (PMC5574192)

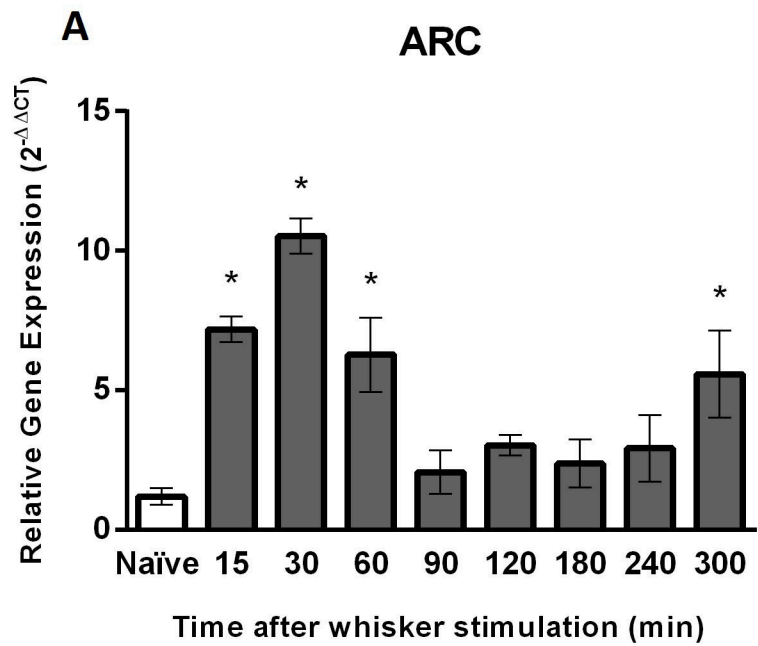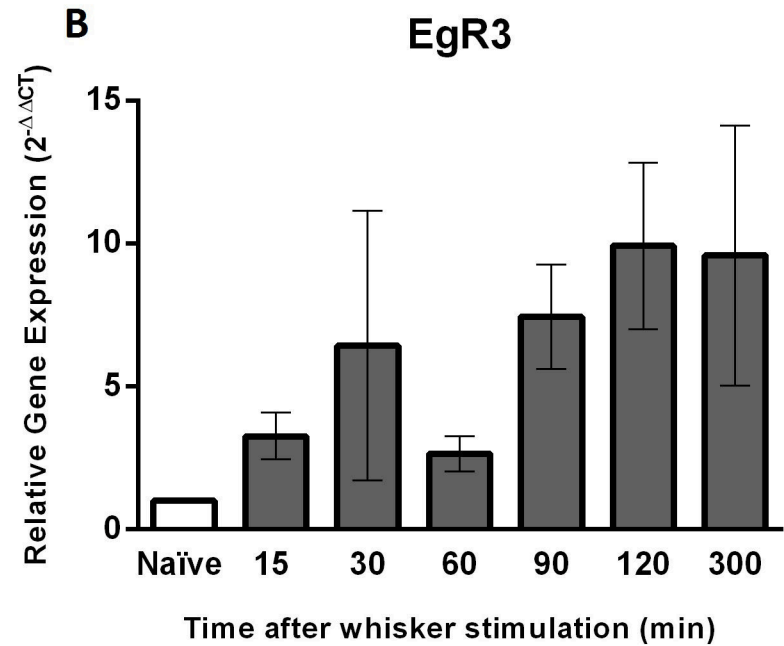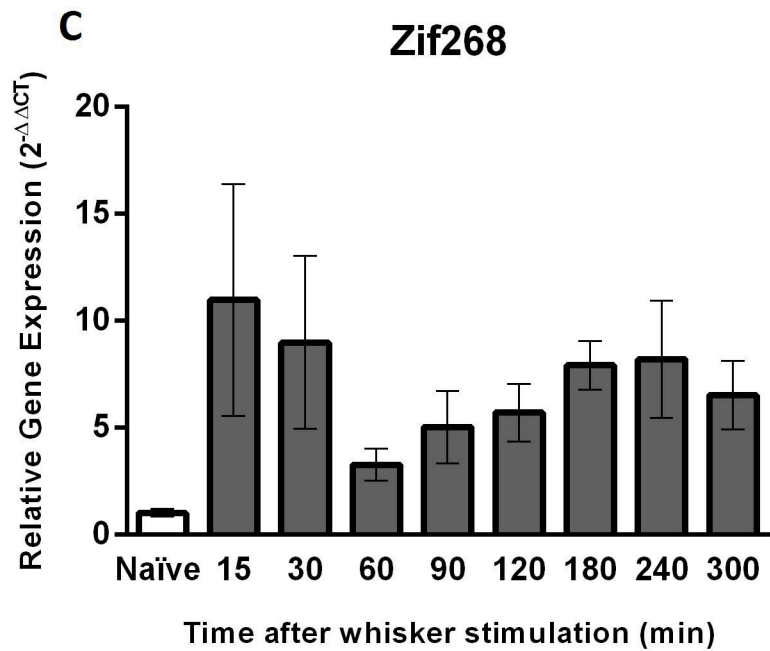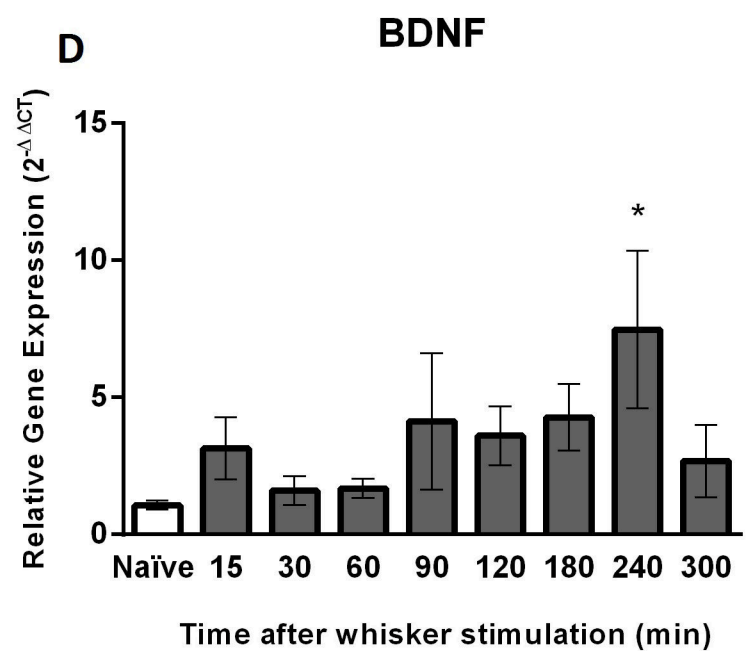

Supplement: NIHMS818689-supplement-Supp_Figure.pdf [file NIHMS818689-supplement-Supp_Figure.pdf]
